1 **Morphogenesis of the islets of Langerhans is guided by extra-endocrine Slit2/3 signals**

2

3

4 Jennifer M. Gilbert<sup>1</sup>, Melissa T. Adams<sup>1</sup>, Nadav Sharon<sup>2</sup>, Hariharan Jayaraaman<sup>1</sup>, Barak Blum<sup>1\*</sup>

5

6

7 <sup>1</sup>Department of Cell and Regenerative Biology, University of Wisconsin-Madison School of Medicine  
8 and Public Health, 1111 Highland Avenue, Madison, WI 53705, USA.

9 <sup>2</sup>Department of Stem Cell and Regenerative Biology, Harvard University, 7 Divinity Avenue, Cambridge,  
10 MA, 02138, USA.

11

12 \*Corresponding author: Barak Blum; [bblum4@wisc.edu](mailto:bblum4@wisc.edu)

13 **Abstract**

14 The spatial architecture of the islets of Langerhans is vitally important for their correct function, and  
15 alterations in islet morphogenesis often result in diabetes mellitus. We have previously reported that  
16 function of Roundabout (Robo) receptors, selectively in  $\beta$ -cells, is required for proper islet  
17 morphogenesis. As part of the Slit-Robo signaling pathway, Robo receptors work in conjunction with  
18 Slit ligands to mediate axon guidance, cell migration, and cell positioning in development. However,  
19 the role of Slit ligands in islet morphogenesis has not yet been determined. Here we report that Slit  
20 ligands are expressed in overlapping and distinct patterns in both endocrine and non-endocrine tissues  
21 in late pancreas development. We show that function of either Slit2 or Slit3, which are predominantly  
22 expressed in the pancreatic mesenchyme, is required and sufficient for islet morphogenesis, while  
23 Slit1, which is predominantly expressed in the endocrine compartment, is dispensable for islet  
24 morphogenesis. We further provide evidence to suggest that Slit-Robo signaling in the pancreas  
25 influences endocrine cell-cell adhesion, not cell migration, during islet morphogenesis. These data add  
26 important understanding to the fundamental question of the formation of the unique architecture of  
27 the islets of Langerhans.

## 28 **Introduction**

29 Blood glucose homeostasis is regulated in the pancreas by clusters of endocrine cells called the islets of  
30 Langerhans. Islets consist of five different endocrine cell types ( $\alpha$ ,  $\beta$ ,  $\delta$ , PP,  $\epsilon$ ), which secrete glucagon,  
31 insulin, somatostatin, pancreatic polypeptide, and ghrelin, respectively. Murine islets exhibit a distinct  
32 cytoarchitecture consisting of a core of  $\beta$ -cells, surrounded by a mantle of  $\alpha$ -,  $\delta$ -, PP- and  $\epsilon$ -cells. The  $\beta$ -  
33 cell core makes up roughly 80% of the islet mass, while the four other cell types make up the remaining  
34 20% (Kim et al., 2009; Steiner et al., 2010). This cytoarchitecture is thought to be important for proper  
35 islet function, and loss of this architectural makeup is described in obesity and diabetes in both mice  
36 and humans (Baetens et al., 1978; Cabrera et al., 2006; Kilimnik et al., 2011; Roscioni et al., 2016).  
37 While the architectural features of islets have been well-documented, the mechanisms controlling this  
38 architecture are still largely unknown.

39 The Slit-Robo signaling pathway has roles in a number of developmental processes, primarily axon  
40 guidance, cell movement, and cell adhesion (Blockus and Chédotal, 2016; Chédotal, 2007; Wu et al.,  
41 2017; Ypsilanti and Chedotal, 2014; Ypsilanti et al., 2010). Slit ligand binding to Robo receptors can  
42 induce cell migration using repulsive or attractive cues in a context-dependent manner. In the  
43 developing mouse, Slit-Robo signaling provides a repulsive corridor to prevent migrating axons from  
44 straying from their path during innervation (Brose et al., 1999; Dickson and Gilestro, 2006). Slit-Robo  
45 binding inactivates Rho GTPases, inhibiting actin polymerization and driving the cell away from the  
46 direction of the Slit signal (Wu et al., 2017; Ypsilanti et al., 2010). Conversely, Slit uses attractive cues to  
47 promote vascular development and angiogenesis. In this context, Slit-Robo interactions activate Rho  
48 GTPases, inducing actin polymerization in the direction of the Slit signal (Rama et al., 2015; Wu et al.,

49 2017; Ypsilanti et al., 2010; Zhang et al., 2009). In both cases, Slit-Robo signaling activity is able to  
50 modulate cell-cell adhesion molecules, which aids cell migration (Tong et al., 2019; Wu et al., 2017).  
51 While Slit and Robo are a canonical signaling pair, both components have alternative binding partners;  
52 Slit ligands are able to bind semaphorins, ephrins, plexin, and neuronatin to regulate cell migration and  
53 metabolic function in specific tissues (Brose et al., 1999; Delloye-Bourgeois et al., 2015; Svensson et al.,  
54 2016; Wright et al., 2012). Robo receptors are capable of forming homodimers to induce axonal  
55 growth (Hivert, 2002).

56 We have recently described a role for Robo receptors in pancreatic islet architecture (Adams et al.,  
57 2018). Specifically, we showed that genetic deletion of *Robo1* and *Robo2* in  $\beta$ -cells (*Robo*  $\beta$ KO) results  
58 in loss of stereotypic murine islet architecture, without affecting  $\beta$ -cell differentiation or maturation.  
59 These Robo-depleted islets have a marked invasion of  $\alpha$ - and  $\delta$ -cells into the  $\beta$ -cell core. Additionally,  
60 *Robo*  $\beta$ KO islets have cell-cell adhesion defects. Given the conserved role of Slits as the canonical Robo  
61 ligands and our recent findings that Robo receptors regulate endocrine cell type sorting in the islet, we  
62 set to investigate the role of Slit ligands in islet morphogenesis.

63

## 64 **Results**

### 65 ***Slits ligands are expressed in different compartments in the developing mouse pancreas.***

66 To test the hypothesis that Slits are involved in Robo-mediated control of islet architecture during  
67 development, we first examined whether any of the Slit ligands are expressed in the pancreas at the  
68 time of islet morphogenesis. We queried a gene expression database, generated by Krentz and  
69 colleagues (Krentz et al., 2018), which contains single-cell RNA-Seq data from embryonic mouse  
70 pancreata. We found that *Slit1* expression is present in a subset of endocrine progenitor cells at

71 embryonic day (E)15.5, and becomes enriched in  $\beta$ -cells by E18.5. *Slit2* and *Slit3* expression is  
72 distributed between pancreatic mesenchyme, acinar, and ductal cell types with negligible expression in  
73 the endocrine compartment at both time points (Figure 1).

74 To more precisely determine the localization of Slit ligands in the pancreas, we analyzed pancreata  
75 from *Slit1*<sup>GFP</sup>, *Slit2*<sup>GFP</sup>, and *Slit3*<sup>LacZ</sup> mice, which have knock-in reporters at their respective endogenous  
76 Slit loci (Plump et al., 2002; Yuan et al., 2003). We identified strong GFP expression in *Slit1*<sup>GFP/+</sup> mice  
77 both in E18.5 and adult islets. This staining pattern overlapped with insulin, indicating that *Slit1* is  
78 expressed in  $\beta$ -cells at both stages (Figure 2A). We were not able to detect *Slit2*<sup>GFP</sup> (Figure 2A) or  
79 *Slit3*<sup>LacZ</sup> (Figure 2B) in either the embryonic or the adult endocrine compartment. However, we  
80 detected both *Slit2*<sup>GFP</sup> and *Slit3*<sup>LacZ</sup> expression in tissues outside of the islet (Figure 2B and 2C). A  
81 previous report by Escot and colleagues identified *Slit3* expression in the mesenchyme (Escot et al.,  
82 2018). We concluded that *Slit1* is the predominant Slit ligand expressed inside the islets, and that *Slit2*  
83 and *Slit3* are expressed outside of the islet during pancreatic development.

#### 84 85 ***Loss of a single Slit ligand does not compromise islet architecture.***

86 Slit and Robo are conserved binding partners, and loss of Robo in the islets of *Robo*  $\beta$ KO mice results in  
87 severely altered islet architecture (Adams et al., 2018). We hypothesized that if Slits mediate Robo-  
88 regulated islet architecture, then eliminating Slit expression would phenocopy the islet organization  
89 defects in *Robo*  $\beta$ KO islets. Whole-body *Slit1*-null (*Slit1*<sup>GFP/GFP</sup>) and *Slit3*-null (*Slit3*<sup>LacZ/LacZ</sup>) mice are viable  
90 to adulthood. We performed positional cell counting on the islets of these mice as we have previously  
91 described (Adams et al., 2018) to determine whether these mutants exhibited islet organizational  
92 defects. In contrast to the phenotype seen in *Robo*  $\beta$ KO islets, individual *Slit1* or *Slit3* mutant islets have

93 completely normal architecture (Figure 3A-C).  $\alpha$ -,  $\beta$ -, and  $\delta$ -cells remain restricted to their respective  
94 niches; the  $\beta$ -cells reside in the core, while the  $\alpha$ - and  $\delta$ -cells remain in the islet mantle. We also found  
95 no significant difference between control islets and *Slit1* or *Slit3* mutant islets in islet size (Figure 3D) or  
96 circularity (Figure 3E). Whole-body *Slit2*-null (*Slit2*<sup>GFP/GFP</sup>) animals die shortly after birth. We thus  
97 examined pancreata of E18.5 *Slit2*<sup>GFP/GFP</sup> embryos. Evidence of altered islet architecture in *Robo*  $\beta$ KO  
98 mutants can be seen at E18.5; however, we did not observe overt defects in the architecture of  
99 *Slit2*<sup>GFP/GFP</sup> islets at this time point (Figure 4). Taken together, these results indicate that individual Slits  
100 are not required for Robo-mediated control of islet architecture.

101

### 102 ***Slit2 and Slit3 compensate for each other and are required for islet morphogenesis.***

103 Slit ligands are highly similar in amino acid sequence, particularly in their Robo-binding domains (Figure  
104 5A). Thus, it is possible that the different Slit ligands compensate for each other during islet  
105 morphogenesis. We tested the extent to which multiple Slit ligands are required for islet architecture  
106 by analyzing islet formation in combinatorial Slit mutants. *Slit1*<sup>GFP/GFP</sup>;*Slit3*<sup>LacZ/LacZ</sup> double knockouts live  
107 to adulthood and appear normal, with no detectable alterations in islet architecture, size, or circularity  
108 (Figure 5B-F). To circumvent the neonatal lethality of *Slit2*<sup>GFP/GFP</sup> mice, we analyzed the pancreata of  
109 *Slit1/2* knockouts (*Slit1*<sup>GFP/GFP</sup>;*Slit2*<sup>GFP/GFP</sup>), *Slit2/3* knockouts (*Slit2*<sup>GFP/GFP</sup>;*Slit3*<sup>LacZ/LacZ</sup>), and *Slit1/2/3*  
110 knockouts (*Slit1*<sup>GFP/GFP</sup>;*Slit2*<sup>GFP/GFP</sup>;*Slit3*<sup>LacZ/LacZ</sup>) at E18.5 and P0. *Slit1/2* knockout islets show no  
111 indications of altered architecture, but *Slit2/3* and *Slit1/2/3* knockouts have disorganized islets (Figure  
112 5G). To quantify this phenotype, we scored islets as either intact (insulin-positive cells surrounded by  
113 glucagon-positive cells), intermediate (clusters of insulin-positive cells disrupted by glucagon-positive  
114 or non-endocrine cells), or disrupted (single cells or clusters of endocrine cells that are not forming islet

115 structures) (Figure 5H). Double-blinded scoring of islets from the above genotypes revealed that wild-  
116 type and *Slit1/2* knockouts have few disrupted islets and similar percentages of intact and intermediate  
117 islets (WT intact: 49%, intermediate: 40%, disrupted: 11%. *Slit1/2* KO intact: 43%, intermediate: 46%,  
118 disrupted: 11%). *Slit2/3* and *Slit1/2/3* knockouts had fewer intact islets and increased numbers of  
119 intermediate and disrupted islets (*Slit2/3* KO intact: 8%, intermediate: 53%, disrupted: 39%. *Slit1/2/3*  
120 KO intact: 8%, intermediate: 60%, disrupted: 32%). Taken together, the data suggest that *Slit1*  
121 (expressed in the islet itself) is dispensable, while *Slit2* and *Slit3* (expressed outside of the islet)  
122 compensate for each other and are required for proper islet organization.

123

124 ***Deletion of all three Slits selectively in the endocrine compartment does not affect islet***  
125 ***morphogenesis.***

126 Our data above suggests that *Slit2* and *Slit3* are involved in islet organization. However, the source of  
127 *Slit2* is unknown. While we were unable to detect the *Slit2-GFP* reporter in the pancreas, scRNA-Seq  
128 data suggests that *Slit2* is present in pancreatic tissue during developmental stages. Further, our data  
129 suggests that *Slit2* and *Slit3* compensate for each other, and that *Slit3* is expressed externally from the  
130 islet. While it is unlikely that compensatory genes are expressed in different tissues, we nevertheless  
131 set out to test whether *Slit2* may be upregulated in endocrine cells as compensation for the absence of  
132 other Slits. We generated *Ngn3-Cre;Slit1<sup>GFP/GFP</sup>;Slit2<sup>flx/flx</sup>;Slit3<sup>LacZ/LacZ</sup>* animals. These animals have whole-  
133 body knockouts of *Slit1* and *Slit3*, with a floxed *Slit2* allele. *Ngn3*, a marker of endocrine progenitors, is  
134 active in every islet endocrine cell, thus depleting *Slit2* from the endocrine compartment only. We  
135 reasoned that if *Slit2* was required in the endocrine compartment to coordinate islet morphogenesis  
136 these mice would display disrupted islet architecture. We found that *Ngn3-*

137 *Cre;Slit1<sup>GFP/GFP</sup>;Slit2<sup>flx/flx</sup>;Slit3<sup>LacZ/LacZ</sup>* mice have intact islets, indistinct from the control (Figure 6). We  
138 concluded that *Slit2* is not supplied by islet endocrine cells, and must be supplied from extra-endocrine  
139 tissue.

140

#### 141 ***Slits do not affect endocrine cell migration but may affect cell adhesion***

142 Because *Slit2/3* and *Slit1/2/3* mutant islets are disrupted and don't cluster tightly, we wondered  
143 whether this indicated a disruption in the Slit-Robo signaling pathway, and thus a failure of  $\beta$ -cells to  
144 migrate properly during islet morphogenesis. We performed Transwell cell migration assays using INS-  
145 1 cells. INS-1 cells seeded in the top chamber of a cell culture insert above INS-1 conditioned media  
146 showed strong migratory activity, while INS-1 cells seeded above fresh, untreated INS-1 culture media  
147 did not (Figure 7A Left, Center, B). Interestingly, INS-1 cells treated with either a non-targeting siRNA or  
148 Robo1/2 siRNA showed similar capacities for migration when seeded above conditioned media, and  
149 very little migratory activity when seeded over INS-1 media (Figure 7A,B). We repeated this experiment  
150 and seeded INS-1 cells over INS-1 media, or INS-1 media supplemented with 10 $\mu$ M recombinant SLIT1,  
151 SLIT2, or SLIT3 (Figure 7C). INS-1 cells did not display any changes in migratory ability at any of these  
152 conditions, suggesting that Slit and Robo interactions may not influence the migratory ability of  $\beta$ -cells.  
153 In addition to directing cell migration, the Slit/Robo pathway can also modulate cell-cell adhesions.  
154 *Robo*  $\beta$ KO islets (*Ins2-Cre;Robo1<sup>-/-</sup>;Robo2<sup>flx/flx</sup>*) containing an *H2B-mCherry* reporter fail to maintain their  
155 structure as intact, clustered islets after isolation from the pancreas (Figure 8). While control islets  
156 (*Ins2-Cre;Robo<sup>+/+</sup>;Robo2<sup>+/+</sup>*) containing the same *H2B-mCherry* reporter remain tightly compacted and  
157 neatly organized after 24 hours of culture, the *Robo*  $\beta$ KO islets are disorganized (noted by the  
158 arrangement of mCherry), look “fluffy” around the edges, and fall apart easily. Taken together, these



159 data suggest that Slit-Robo interactions in the pancreas may not influence the migratory ability of  $\beta$ -  
160 cells, and may be contributing to islet morphogenesis by modulating cell-cell adhesion.

161

## 162 **Discussion**

163 In this study, we demonstrate that Slit ligands are required for pancreatic islet architecture.  
164 Simultaneous loss of all three ligands results in a disrupted, “islet explosion-like” phenotype, which is  
165 also observed in *Slit2*<sup>GFP/GFP</sup>;*Slit3*<sup>LacZ/LacZ</sup> knockouts. These findings lead us to conclude that all three Slit  
166 ligands are indeed present in the pancreas, and that *Slit2* and *Slit3* have redundant roles in developing  
167 islet architecture.

168 The exact mechanism of Slits in islet morphogenesis is unknown; however, the presence of Robo in the  
169 pancreas provides some clues. Slit and Robo are ligand-receptor binding partners in the Slit-Robo  
170 signaling pathway. During mammalian development, Slit and Robo occupy adjacent tissues, specifying  
171 complimentary expression patterns in the developing organism (Yuan et al., 1999). While all three Slits  
172 have expression patterns unique to their specific domain, they also have overlapping regions of  
173 expression, suggesting some genetic redundancy. Interestingly, *Slit2* and *Slit3* share more expression  
174 domains with each other than either of them do with *Slit1* (Yuan et al., 1999). We have observed a  
175 similar framework in the mouse pancreas: Robo is primarily expressed in endocrine cells (Adams et al.,  
176 2018), while *Slit2* and *Slit3* have overlapping expression patterns in pancreatic mesenchyme. These  
177 complimentary and overlapping regions of expression are hallmarks of ligand-receptor binding  
178 partners, and suggest that mesenchymal Slits interact with endocrine Robo to coordinate islet  
179 architecture. We propose that Slit signals from the mesenchyme are picked up by Robo receptors on  
180 the surface of developing islet endocrine cells. Loss of this signal results in a failure of islet

181 morphogenesis, thus the “islet explosion” phenotype described above. It is possible that Slits are not  
182 the only signal required for morphogenesis, as some of the islets in *Slit2*<sup>GFP/GFP</sup>;*Slit3*<sup>LacZ/LacZ</sup> and triple  
183 knockout animals showed evidence of appropriate clustering. Future work will determine whether  
184 other ligands or even Robo-Robo interactions are involved in islet morphogenesis.

185 It is commonly held that islet morphogenesis is outlined by delamination of endocrine progenitors  
186 from the pancreatic duct, followed by their migration as individual cells through the mesenchyme and  
187 aggregation into islets (Pan and Wright, 2011). We provide evidence to suggest that disruption of Slit-  
188 Robo signaling influences endocrine cell-cell adhesion, not migration, during islet morphogenesis.  
189 Rather than delamination and migration as individual cells, our data is in support of the recent  
190 observation that endocrine progenitors remain physically connected throughout islet morphogenesis  
191 (Sharon et al., 2019), and suggest that disruption of this cell-cell adhesion causes the disorganized islet  
192 architecture phenotype in both *Slit2/3*-null and *Robo*  $\beta$ KO islets.

193 The role of *Slit1* in the islet remains elusive. The islet architecture phenotypes seen in  
194 *Slit2*<sup>GFP/GFP</sup>;*Slit3*<sup>LacZ/LacZ</sup> animals are not significantly different in triple knockouts, suggesting that *Slit1*  
195 does not have any influence on islet architecture. In addition, *Slit1* expression does not overlap with  
196 *Slit2* or *Slit3*, thus it is unlikely to be redundant. However, *Slit1* has a strong presence in islet  $\beta$ -cells.  
197 Given that Slits have been observed to provide a protective effect on  $\beta$ -cells, as well as potentiate  
198 insulin secretion in  $\beta$ -cells (Yang et al., 2013), it seems likely that *Slit1* has a unique role in the islet.  
199 Future work elucidating the function of *Slit1* in the islet will be instructive.

200 We have demonstrated that *Slit2* and *Slit3* are required for proper islet cell organization in the  
201 pancreas. Taken together, our results described here in conjunction with previously published data on

202 Robo suggest that Slit-Robo signaling is required for proper islet organization and development in the  
203 mouse.

## 204 **Methods**

### 205 Animals

206 All animal experiments were conducted in accordance with the University of Wisconsin-Madison IACUC  
207 guidelines under approved protocol #M005221. *Robo1<sup>-/-</sup>;Robo2<sup>flx</sup>* (Branchfield et al., 2016), *Ins2-Cre*  
208 (Postic et al., 1999), *Ngn3-Cre* (Schonhoff et al., 2004), *H2B-mCherry* (Blum et al., 2014), *Slit1<sup>GFP</sup>*,  
209 *Slit2<sup>GFP</sup>* (Plump et al., 2002), *Slit3<sup>LacZ</sup>* (Yuan et al., 2003), *Slit2<sup>flx</sup>* (Rama et al., 2015) alleles have been  
210 previously described.

211

### 212 Expression Analysis

213 tSNE plots of sc-RNA Seq obtained from the Lynn Lab's Single Cell Gene Expression Atlas  
214 ([https://lynnlab.shinyapps.io/embryonic\\_pancreas/](https://lynnlab.shinyapps.io/embryonic_pancreas/)) (Krentz et al., 2018).

215

### 216 Immunostaining

217 Pancreata were dissected from adult (~8week old), embryonic (E18.5), or newborn (P0) mice, fixed in  
218 4% paraformaldehyde for 1 hour at room temperature (20-30 minutes for E18.5 and P0), preserved in  
219 30% sucrose, embedded in OCT (Leica), then sectioned onto slides. Slides were stained according to  
220 the following protocol: 1 hour block in 10% Normal Donkey Serum in PBST, 1 hour primary antibody  
221 incubation, PBST wash, 1 hour secondary antibody incubation, PBST wash, mount in Fluoromount-G  
222 (Thermo Fisher). The following primary antibodies were used: Guinea Pig anti-Insulin 1:800 (Dako),  
223 Guinea Pig anti-Insulin 1:6 (Dako 1R002), Chicken anti-GFP 1:1000 (Abcam ab13970), Rabbit anti-  
224 Glucagon 1:200 (Cell Signaling 2760), Goat anti-Somatostatin 1:50 (Santa Cruz), Rabbit anti-  
225 Somatostatin 1:800 (Phoenix G-060-03), DAPI 1:10,000 (Sigma 9542). The following secondary

226 antibodies were used at 1:500: Alexa 647 anti-Guinea Pig, Alexa 594 anti-Rabbit, Alexa 594 anti-Goat,  
227 Alexa 488 anti-Rabbit, Alexa 488 anti-Chicken.

228 For eye analysis, tissues were dissected and fixed in 4% paraformaldehyde for 2 hours at 4°C. Tissues  
229 were preserved in a series of sucrose solutions (10%, 20% sucrose) for 1.5 hours each. Tissues were  
230 further preserved in 30% sucrose overnight, embedded in OCT, then sectioned and stained as above.

231 For  $\beta$ -galactosidase staining, tissues were fixed in 4% paraformaldehyde for 1 hour at room  
232 temperature (or 20-30 minutes for E18.5 tissue). Fixed tissues were stained with X-gal solution (Roche  
233 11828673001) for 22 hours at 37°C, then preserved, embedded, and sectioned as above. Insulin  
234 staining on these tissues was done using the Vectastain ABC HRP kit (Vector Labs PK-4007), NovaRED  
235 kit (Vector Labs SK-4800), and mounted with VectaMount (Vector Labs H-5000). Slides for expression  
236 analysis imaged using a Zeiss Axio Observer Z1.

237

238 Cell Counting, Shape, Size Analysis

239 Slides used for cell counting or shape and size analysis were imaged on a Nikon A1RS confocal  
240 microscope. Confocal z-stacks were converted to maximum intensity projected images. The number of  
241  $\alpha$ - and  $\delta$ - cells were counted using the ImageJ Cell Counter tool.  $\alpha$ - or  $\delta$ - cells were considered in the  
242 islet periphery if they were within the first two cell layers of the islet. For shape and size analysis, islets  
243 were outlined and a threshold was applied in ImageJ. The Analyze Particles tool then gave readout of  
244 islet size in microns<sup>2</sup> and a circularity score (between 0-1, where 1 indicates a perfect circle). A  
245 minimum of 10 islets were analyzed across at least three different tissue sections per mouse. Analysis  
246 performed on  $n=3$  mice for each genotype.  $\alpha$ - and  $\delta$ -cell percentages, islet size, and islet circularity  
247 values were averaged for each mouse and plotted in Prism.

248

## 249 Amino Acid Alignment

250 Amino acid sequence and domain information were obtained from Yuan et al., 1999. Pairwise  
251 alignment scores of amino acid sequences were provided by ClustalW ([https://www.genome.jp/tools-](https://www.genome.jp/tools-bin/clustalw)  
252 [bin/clustalw](https://www.genome.jp/tools-bin/clustalw)).

253

## 254 Islet Scoring

255 Islet scoring was performed on images of tissue sections stained for insulin, glucagon, and DAPI. Z-stack  
256 images were converted to maximum intensity projected images, and randomly assigned a number  
257 identifier. Four independent trials (by four different researchers) of double-blinded scoring was  
258 performed on 197 images, comprising at least 10 images spanning four different tissue sections per  
259 mouse, and at least 3 mice per genotype.

260

## 261 siRNA Treatment and Transwell Cell Migration Assay

262 INS-1 cells (AddexBio) were maintained in culture media containing RPMI-1640 (ThermoFisher), 10%  
263 FBS, 1% penicillin/streptomycin, and supplemented with 0.05mM  $\beta$ -mercaptoethanol. For siRNA  
264 treatment, cells were treated with either 60nM ON-TARGETplus Non-targeting siRNA or 30nM each  
265 *Robo1* and *Robo2* ON-TARGETplus SMARTPool siRNA (Horizon Discovery). siRNA knockdown was  
266 confirmed by qPCR using Brilliant III Ultra-Fast SYBR Green reagents, Robo primers (*Robo1*: 5'-  
267 AACTGCTGCACAGCCAGCAA-3', 5'-TGCTATACAATCAGCTGGGCGAC-3', *Robo2*: 5'-  
268 ACCAGGGTTGGATCAGAGGAG-3', 5'-TCTCAGCCTCCGAGGACCA-3'), and  $\beta$ -actin primers (5'-  
269 TGCTCAGCCTGTACGCAACA-3', 5'-CCCGCAATGTCTACCCGCAT-3'), run on a CFX Connect Instrument

270 (Bio-Rad). After siRNA treatment, cells were seeded at a density of 250,000 cells/mL in Transwell cell  
271 culture inserts with 8 $\mu$ M pores (Sigma). Inserts were placed into wells containing either 700 $\mu$ L INS-1  
272 culture media or 700 $\mu$ L INS-1 conditioned media and cultured at 37°C for 48 hours. Inserts were then  
273 fixed in 4% paraformaldehyde for 20 minutes, unmigrated cells were wiped off the top of the insert,  
274 and then inserts were incubated in 0.08% crystal violet and a 1:10,000 concentration of DAPI to  
275 visualize the cells. Nine non-overlapping field of view images were taken for each insert. Three images  
276 per insert were chosen at random for quantification. Results are reported as the average number of  
277 cells that migrated per field of view. Recombinant SLIT cell migration experiments were performed as  
278 described with INS-1 cells seeded in Transwell inserts placed in wells containing INS-1 media, INS-1  
279 conditioned media, or INS-1 media supplemented with 10 $\mu$ M Recombinant SLIT1, SLIT2, or SLIT3 (R&D  
280 Systems).

281

#### 282 Islet Isolation

283 Mice were perfused through the bile duct with 0.8mM Collagenase P (Roche) in 1xDMEM  
284 (ThermoFisher). Pancreata were removed and digested by reciprocal shaking in a 37°C water bath at  
285 200 RPM. Islets were purified by gradient centrifugation in Histopaque-1077 and -1119 (Sigma),  
286 cultured overnight at 37°C in 1xDMEM, 10% FBS, and 1% penicillin/streptomycin, and imaged the  
287 following day.

288

#### 289 Statistical Analysis

290 All data reported as mean  $\pm$ SEM unless otherwise indicated. P-values calculated using Student's T-test  
291 in Prism GraphPad 7 unless otherwise indicated. Any p-value  $<0.05$  was considered significant and  
292 marked with an asterisk.

293

#### 294 **Author Contributions**

295 Conceptualization, B.B. and J.M.G; Methodology, B.B. and J.M.G; Investigation, J.M.G, M.T.A., N.S, and  
296 H.J.; Formal Analysis, J.M.G, M.T.A., N.S, and H.J.; Writing Original Draft, B.B and J.M.G.; Writing,  
297 Review and Editing, all authors; Funding Acquisition, B.B.; Supervision, B.B.

298

#### 299 **Acknowledgements**

300 We thank members of the Blum lab, especially Bayley Waters and Dex Nimkulrat for valuable  
301 discussion and comments on the manuscript. We thank Le Ma, David Ornitz, Alain Chedotal, and Marc  
302 Tessier-Lavigne for mice. We are grateful to Francis Lynn and Nicole Krentz for allowing us to use their  
303 scRNA-seq data, and to Cody Frederickson for help generating figures. We are also grateful to Lance  
304 Rodenkirch and the UW-Madison Optical Imaging Core for help with imaging. This work was funded in  
305 part by the following grants. R01DK121706 from the NIDDK, the DRC at Washington University Pilot  
306 Grant P30DK020579, and Pilot Award UL1TR000427 from the UW-Madison Institute for Clinical and  
307 Translational Research (ICTR). JMG and MTA were funded by 5T32GM007133-44, a graduate training  
308 award from the UW-Madison Stem Cell & Regenerative Medicine Center, and an Advanced  
309 Opportunity Fellowship through SciMed Graduate Research Scholars at UW-Madison.

310



311 **References**

312

313 **Adams, M. T., Gilbert, J. M., Hinojosa Paiz, J., Bowman, F. M. and Blum, B.** (2018). Endocrine cell type

314 sorting and mature architecture in the islets of Langerhans require expression of Roundabout

315 receptors in  $\beta$  cells. *Sci. Rep.* **8**, 10876.

316 **Baetens, D., Stefan, Y., Ravazzola, M., Malaisse-Lagae, F., Coleman, D. L. and Orci, L.** (1978).

317 Alteration of islet cell populations in spontaneously diabetic mice. *Diabetes* **27**, 1–7.

318 **Blockus, H. and Chédotal, A.** (2016). Slit-Robo signaling. *Development* **143**, 3037–3044.

319 **Blum, B., Roose, A. N., Barrandon, O., Maehr, R., Arvanites, A. C., Davidow, L. S., Davis, J. C.,**

320 **Peterson, Q. P., Rubin, L. L. and Melton, D. A.** (2014). Reversal of  $\beta$  cell de-differentiation by a

321 small molecule inhibitor of the TGF $\beta$  pathway. *Elife* **3**, e02809.

322 **Branchfield, K., Nantie, L., Verheyden, J. M., Sui, P., Wienhold, M. D. and Sun, X.** (2016). Pulmonary

323 neuroendocrine cells function as airway sensors to control lung immune response. *Science* (80-. ).

324 **351**, 707–710.

325 **Brose, K., Bland, K. S., Wang, K. H., Arnott, D., Henzel, W., Goodman, C. S., Tessier-lavigne, M., Kidd,**

326 **T., Way, D. N. A. and Francisco, S. S.** (1999). Slit Proteins Bind Robo Receptors and Have an

327 Evolutionarily Conserved Role in Repulsive Axon Guidance. **96**, 795–806.

328 **Cabrera, O., Berman, D. M., Kenyon, N. S., Ricordi, C., Berggren, P.-O. and Caicedo, A.** (2006). The

329 unique cytoarchitecture of human pancreatic islets has implications for islet cell function. *Proc.*

330 *Natl. Acad. Sci. U. S. A.* **103**, 2334–9.

331 **Chédotal, A.** (2007). Slits and their receptors. *Adv. Exp. Med. Biol.* **621**, 65–80.

332 **Delloye-Bourgeois, C., Jacquier, A., Charoy, C., Reynaud, F., Nawabi, H., Thoinet, K., Kindbeiter, K.,**

333 **Yoshida, Y., Zagar, Y., Kong, Y., et al.** (2015). PlexinA1 is a new Slit receptor and mediates axon

- 334 guidance function of Slit C-terminal fragments. *Nat. Neurosci.* **18**, 36–45.
- 335 **Dickson, B. J. and Gilestro, G. F.** (2006). Regulation of Commissural Axon Pathfinding by Slit and its  
336 Robo Receptors. *Annu. Rev. Cell Dev. Biol.* **22**, 651–675.
- 337 **Escot, S., Willnow, D., Naumann, H., Di Francescantonio, S. and Spagnoli, F. M.** (2018). Robo signalling  
338 controls pancreatic progenitor identity by regulating Tead transcription factors. *Nat. Commun.* **9**,  
339 5082.
- 340 **Hivert, B.** (2002). Robo1 and Robo2 Are Homophilic Binding Molecules That Promote Axonal Growth.  
341 *Mol. Cell. Neurosci.* **21**, 534–545.
- 342 **Kilimnik, G., Zhao, B., Jo, J., Periwal, V., Witkowski, P. and Misawa, R.** (2011). Altered Islet  
343 Composition and Disproportionate Loss of Large Islets in Patients with Type 2 Diabetes. **6**,.
- 344 **Kim, A., Miller, K., Jo, J., Kilimnik, G., Wojcik, P. and Hara, M.** (2009). Islet architecture: A comparative  
345 study. *Islets* **1**, 129–136.
- 346 **Krentz, N. A., Lee, M., Xu, E. E., Sasaki, S. and Lynn, F. C.** (2018). Single cell transcriptome profiling of  
347 mouse and hESC-derived pancreatic progenitors. *bioRxiv* 289470.
- 348 **Pan, F. C. and Wright, C.** (2011). Pancreas organogenesis: From bud to plexus to gland. *Dev. Dyn.* **240**,  
349 530–565.
- 350 **Plump, A. S., Erskine, L., Sabatier, C., Brose, K., Epstein, C. J., Goodman, C. S., Mason, C. A. and**  
351 **Tessier-Lavigne, M.** (2002). Slit1 and Slit2 cooperate to prevent premature midline crossing of  
352 retinal axons in the mouse visual system. *Neuron* **33**, 219–232.
- 353 **Postic, C., Shiota, M., Niswender, K. D., Jetton, T. L., Chen, Y., Moates, J. M., Shelton, K. D., Lindner,**  
354 **J., Cherrington, A. D. and Magnuson, M. A.** (1999). Dual roles for glucokinase in glucose  
355 homeostasis as determined by liver and pancreatic  $\beta$  cell-specific gene knock-outs using Cre

- 356 recombinase. *J. Biol. Chem.* **274**, 305–315.
- 357 **Rama, N., Dubrac, A., Mathivet, T., Ní Chárthaigh, R.-A., Genet, G., Cristofaro, B., Pibouin-Fragner, L.,**  
358 **Ma, L., Eichmann, A. and Chédotal, A.** (2015). Slit2 signaling through Robo1 and Robo2 is required  
359 for retinal neovascularization. *Nat. Med.* **21**, 483–491.
- 360 **Roscioni, S. S., Migliorini, A., Gegg, M. and Lickert, H.** (2016). Impact of islet architecture on  $\beta$ -cell  
361 heterogeneity, plasticity and function. *Nat. Rev. Endocrinol.* **12**, 695–709.
- 362 **Schonhoff, S. E., Giel-Moloney, M. and Leiter, A. B.** (2004). Neurogenin 3-expressing progenitor cells in  
363 the gastrointestinal tract differentiate into both endocrine and non-endocrine cell types. *Dev. Biol.*  
364 **270**, 443–454.
- 365 **Sharon, N., Chawla, R., Mueller, J., Gifford, D. K., Trapnell, C., Melton, D., Sharon, N., Chawla, R.,**  
366 **Mueller, J., Vanderhooft, J., et al.** (2019). Differentiation with Morphogenesis to Generate A  
367 Peninsular Structure Coordinates Asynchronous Differentiation with Morphogenesis to Generate  
368 Pancreatic Islets. 1–15.
- 369 **Steiner, D. J., Kim, A., Miller, K. and Hara, M.** (2010). Pancreatic islet plasticity: Interspecies  
370 comparison of islet architecture and composition. *Islets* **2**,.
- 371 **Svensson, K. J., Long, J. Z., Jedrychowski, M. P., Cohen, P., Lo, J. C., Serag, S., Kir, S., Shinoda, K.,**  
372 **Tartaglia, J. A., Rao, R. R., et al.** (2016). A secreted slit2 fragment regulates adipose tissue  
373 thermogenesis and metabolic function. *Cell Metab.* **23**, 454–466.
- 374 **Tong, M., Jun, T., Nie, Y., Hao, J. and Fan, D.** (2019). The role of the SLIT/Robo signaling pathway. *J.*  
375 *Cancer* **10**, 2694–2705.
- 376 **Wright, K. M., Lyon, K. A., Leung, H., Leahy, D. J., Ma, L. and Ginty, D. D.** (2012). Dystroglycan  
377 Organizes Axon Guidance Cue Localization and Axonal Pathfinding. *Neuron* **76**, 931–944.

- 378 **Wu, M. F., Liao, C. Y., Wang, L. Y. and Chang, J. T.** (2017). The role of Slit-Robo signaling in the  
379 regulation of tissue barriers. *Tissue Barriers* **5**, 1–17.
- 380 **Yang, Y. H. C., Manning Fox, J. E., Zhang, K. L., MacDonald, P. E. and Johnson, J. D.** (2013). Intraislet  
381 SLIT-ROBO signaling is required for beta-cell survival and potentiates insulin secretion. *Proc. Natl.*  
382 *Acad. Sci. U. S. A.* **110**, 16480–5.
- 383 **Ypsilanti, A. R. and Chedotal, A.** (2014). Roundabout receptors. *Adv. Neurobiol.* **8**, 133–64.
- 384 **Ypsilanti, A. R., Zagar, Y. and Chedotal, A.** (2010). Moving away from the midline: new developments  
385 for Slit and Robo. *Development* **137**, 1939–1952.
- 386 **Yuan, W., Zhou, L., Chen, J. H., Wu, J. Y., Rao, Y. and Ornitz, D. M.** (1999). The mouse SLIT family:  
387 secreted ligands for ROBO expressed in patterns that suggest a role in morphogenesis and axon  
388 guidance. *Dev. Biol.* **212**, 290–306.
- 389 **Yuan, W., Rao, Y., Babiuk, R. P., Greer, J. J., Wu, J. Y. and Ornitz, D. M.** (2003). A genetic model for a  
390 central (septum transversum) congenital diaphragmatic hernia in mice lacking Slit3. *Proc Natl*  
391 *Acad Sci USA* **100**, 5217–5222.
- 392 **Zhang, B., Dietrich, U. M., Geng, J. G., Bicknell, R., Esko, J. D. and Wang, L.** (2009). Repulsive axon  
393 guidance molecule Slit3 is a novel angiogenic factor. *Blood* **114**, 4300–4309.

394

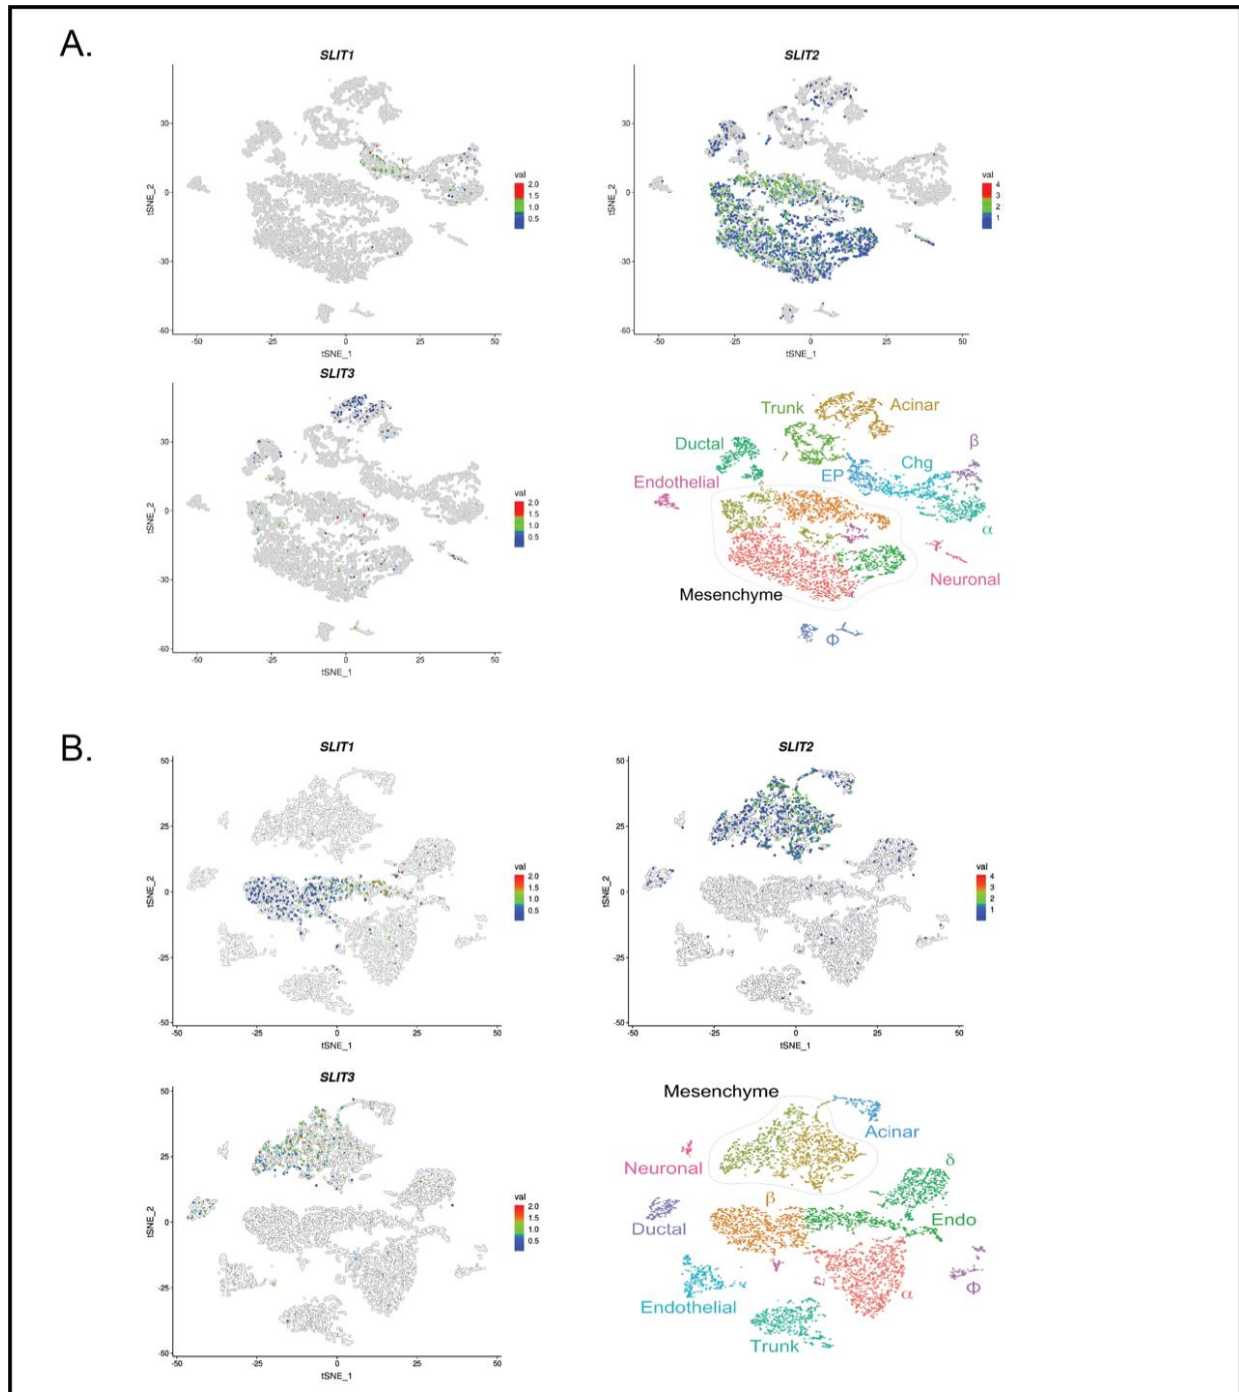

**Figure 1: Slit transcripts are expressed in different compartments in the developing murine pancreas.** Single-cell RNA-Seq data (scRNA-Seq) adapted from Krentz and colleagues (Krentz et al. 2018). tSNE plots depicting *Slit1*, *Slit2*, and *Slit3* expression in pancreatic cells. Time points analyzed are E15.5 (A) and E18.5 (B). *Slit1* is restricted to the endocrine compartment, while *Slit2* and *Slit3* localize with the mesenchyme/acinar compartment.

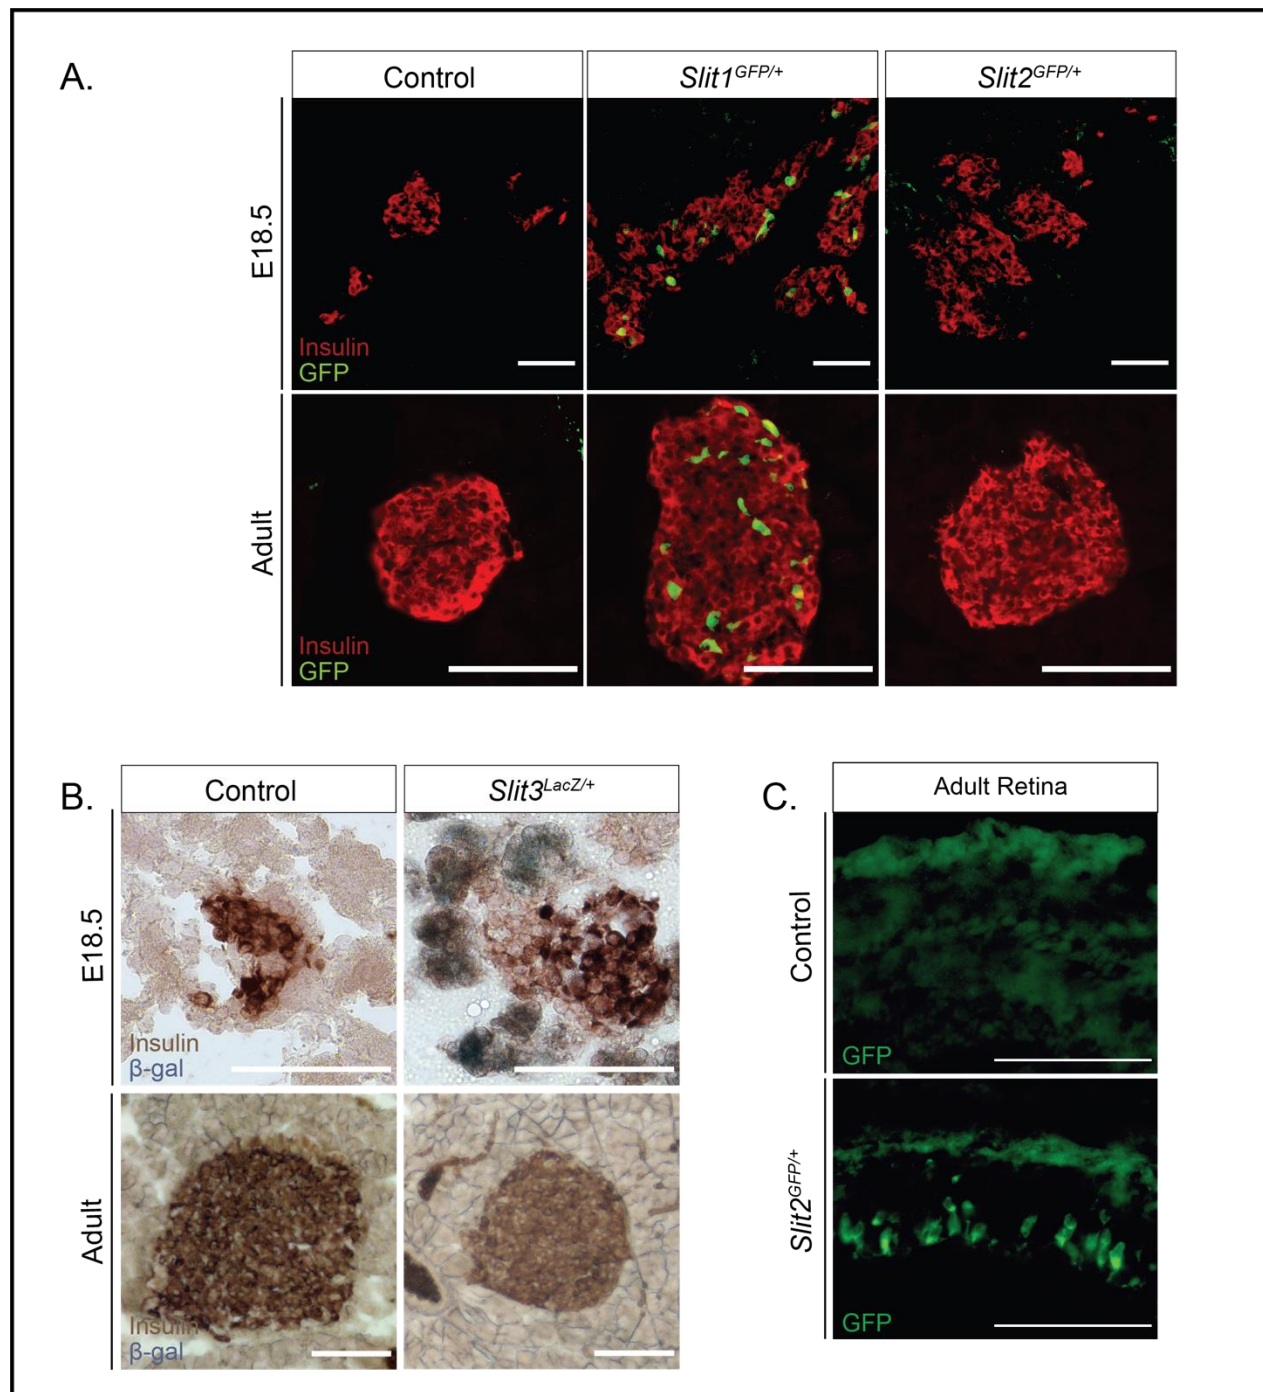

**Figure 2: *Slit1*, but not *Slit2* or *Slit3*, is expressed in the mouse pancreas from embryonic stages to adulthood.** (A) Immunofluorescence staining of  $\beta$ -cells (Insulin, red) and *Slit1*, *Slit2* (GFP, green) in E18.5 and adult heterozygous knock-in mice. (B)  $\beta$ -gal staining of *Slit3* (*LacZ*, blue) in E18.5 and adult heterozygous knock-in mice.  $\beta$ -gal staining (*Slit3* expression) is apparent in non-endocrine tissue surrounding the islet in the embryo. (C) Immunofluorescence staining of *Slit2* (GFP, green) in retinal sections from control (wild type) or *Slit2*<sup>GFP/+</sup> heterozygous animals. Scale bar = 100 microns.



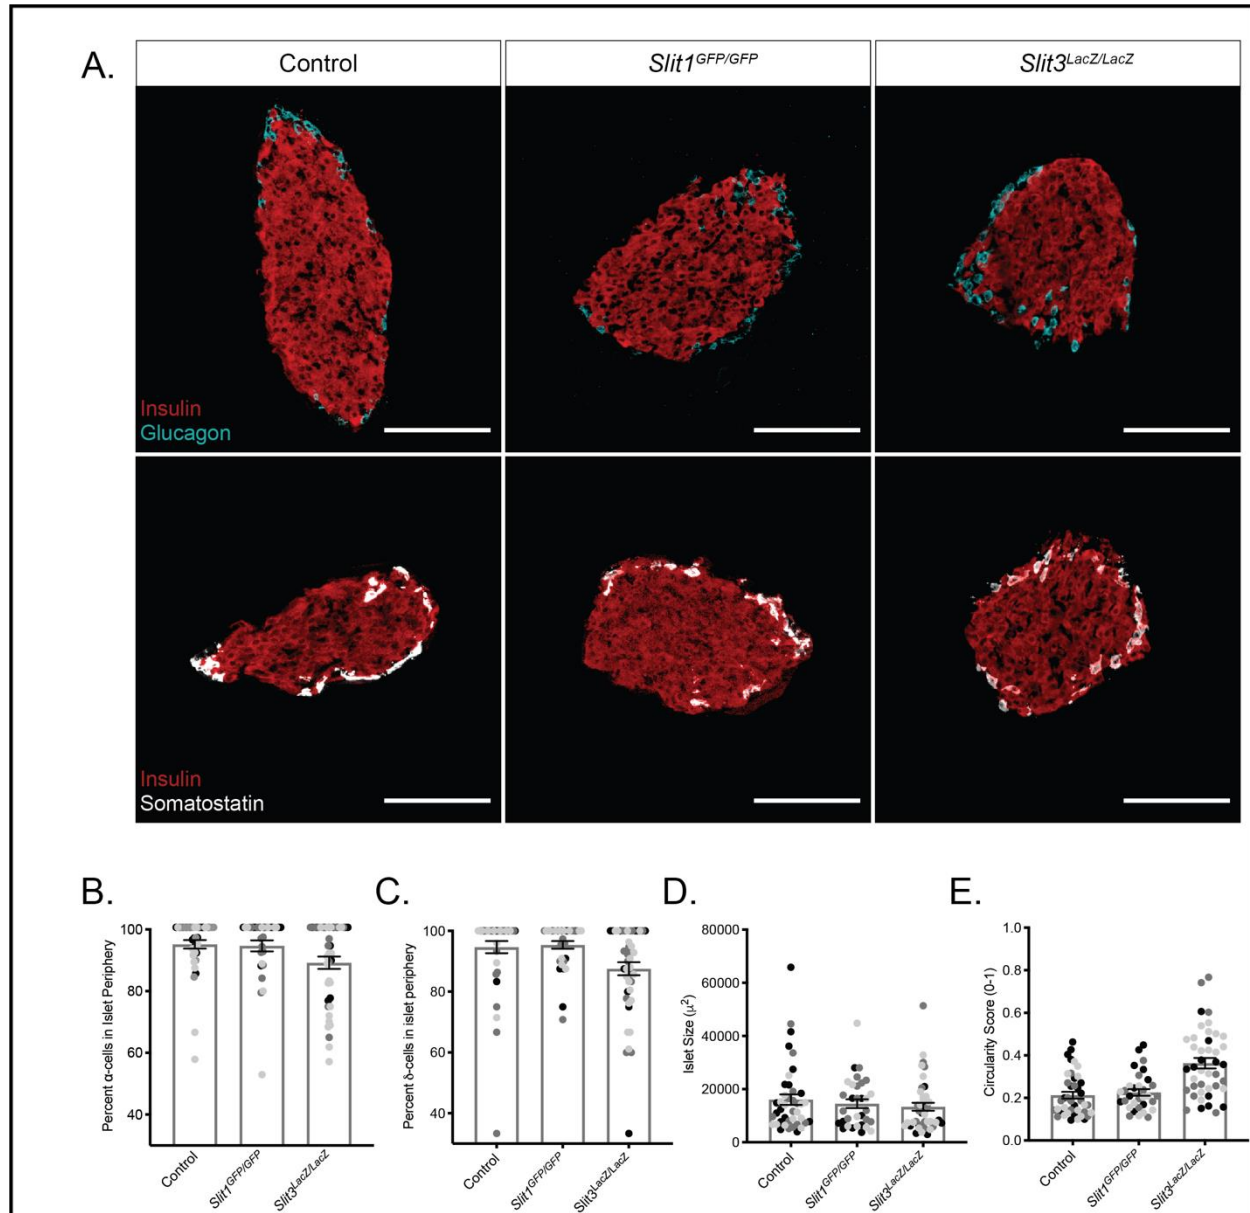

**Figure 3: Loss of a single Slit ligand does not compromise islet architecture.** (A) Immunofluorescence staining of  $\beta$ -cells (Insulin, red),  $\alpha$ -cells (Glucagon, cyan) and  $\delta$ -cells (Somatostatin, white) in adult (~8 week old) homozygous knockout mice. Scale bar = 100 microns. (B) Percentage of  $\alpha$ -cells found in the islet periphery out of total  $\alpha$ -cells. (C) Percentage of  $\delta$ -cells found in the islet periphery out of total  $\delta$ -cells. (D) Average islet size (E) Average islet circularity (as noted by a circularity score of 0-1, where 1 is a perfect circle). Data presented as mean  $\pm$  SEM.

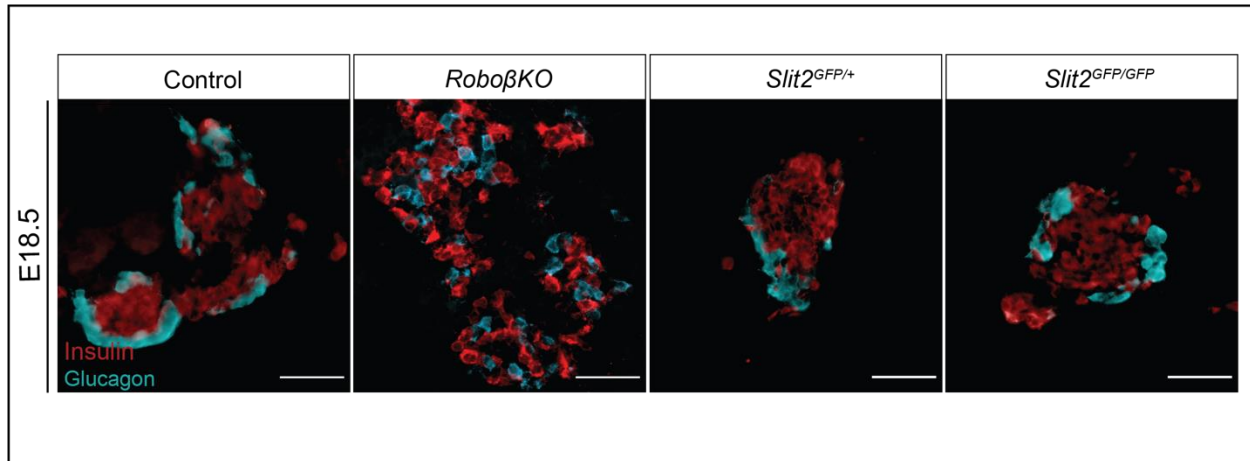

**Figure 4: *Slit2* knockout embryos do not have islet architectural defects.** Immunofluorescence staining of  $\beta$ -cells (Insulin, red) and  $\alpha$ -cells (Glucagon, cyan) in E18.5 control, *Ins2-Cre;Robo1*<sup>-/-</sup>; *Robo2*<sup>fix/fix</sup>, and *Slit2* mice. Scale bar = 50 microns.



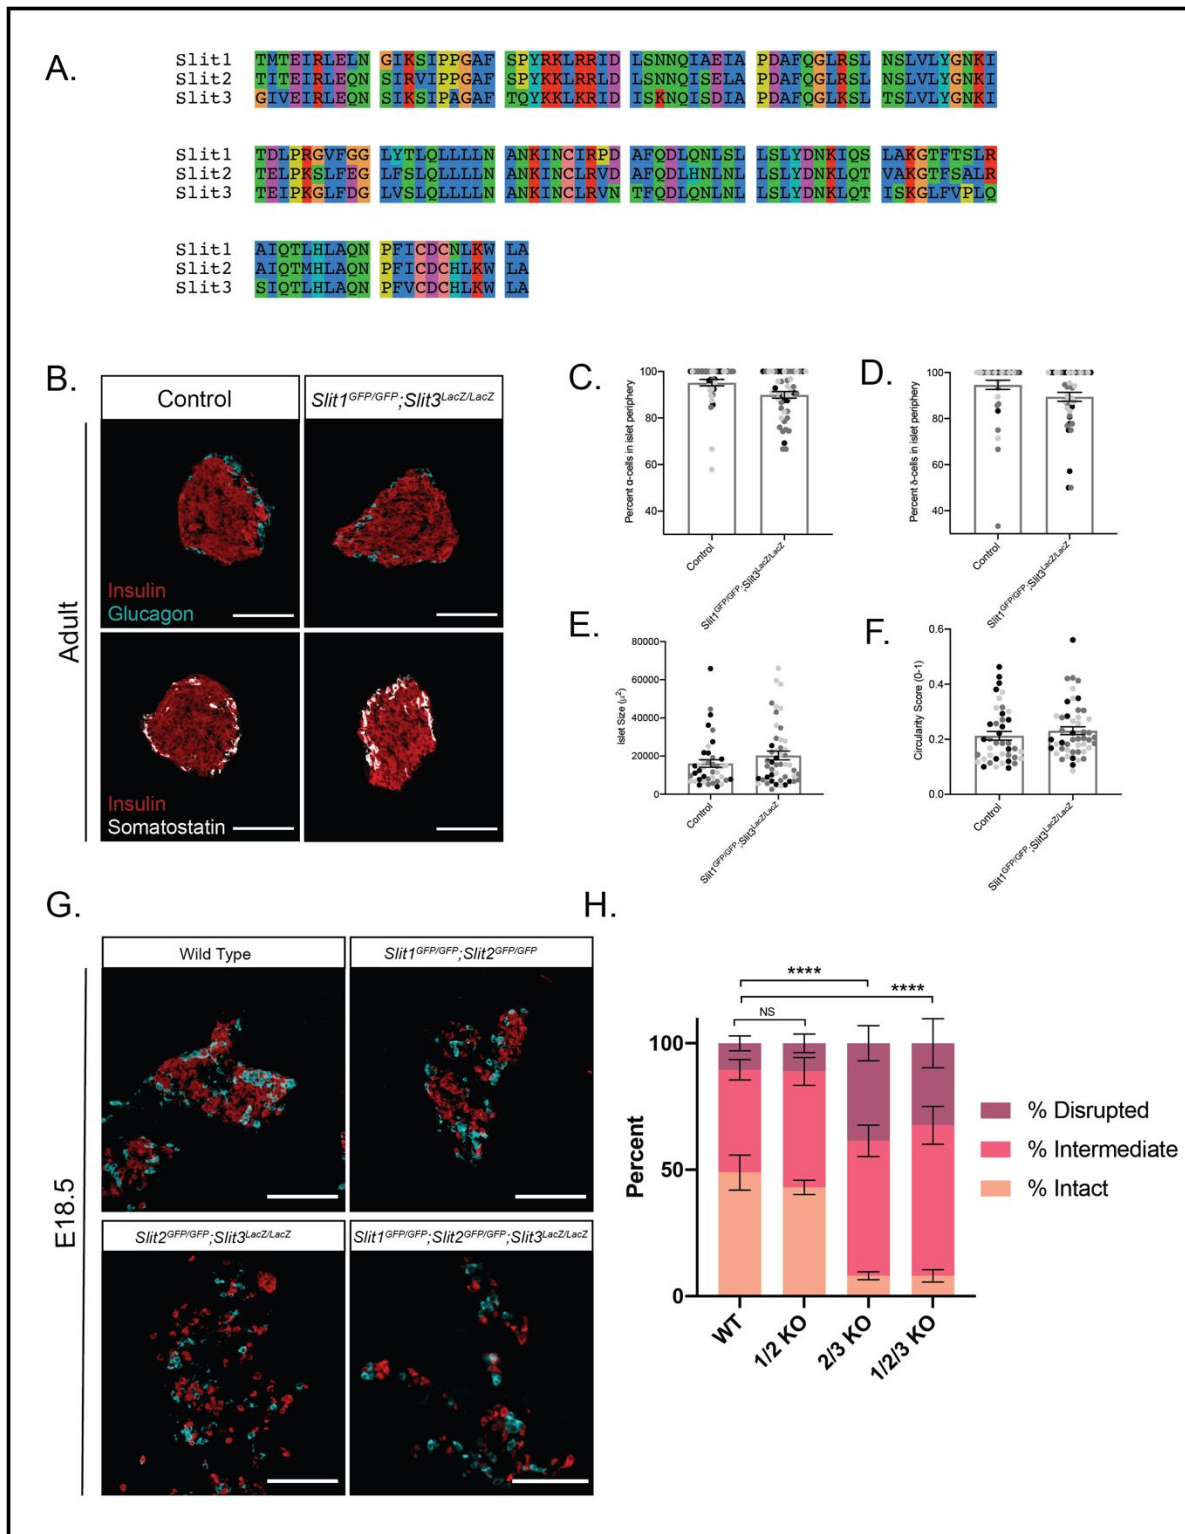

**Figure 5: *Slit2* and *Slit3* compensate for one another in islet morphogenesis.** (A) Amino acid alignment of the Robo-binding domain LRR2 (*Slit1*: 310aa-451aa, *Slit2*: 301aa-442aa, *Slit3*: 308aa-449aa) of all three murine Slits. In this region, the pairwise alignment scores are: *Slit1/Slit2*: 77%, *Slit1/Slit3*: 69%, *Slit2/Slit3*: 70%. (B) Immunofluorescence staining of  $\beta$ -cells

(Insulin, red),  $\alpha$ -cells (Glucagon, cyan) and  $\delta$ -cells (Somatostatin, white) in adult (~8 week old) homozygous  $Slit1^{GFP/GFP};Slit3^{LacZ/LacZ}$  knockout mice. Scale bar = 100 microns. (C) Percentage of  $\alpha$ -cells found in the islet periphery out of total  $\alpha$ -cells. (D) Percentage of  $\delta$ -cells found in the islet periphery out of total  $\delta$ -cells. (E) Average islet size (F) Average islet circularity (as noted by a circularity score of 0-1, where 1 is a perfect circle). Data presented as mean  $\pm$ SEM. (G) Immunofluorescence staining of  $\beta$ -cells (Insulin, red) and  $\alpha$ -cells (Glucagon, cyan) in control (wild-type), double, and triple knockout mice at E18.5/P0. Scale bar = 100 microns. (H) Percentage of islets from each genotype that were scored as intact, intermediate, or disrupted. Data presented as mean  $\pm$ SEM.  $p < 0.0001$ ; Chi-square test.

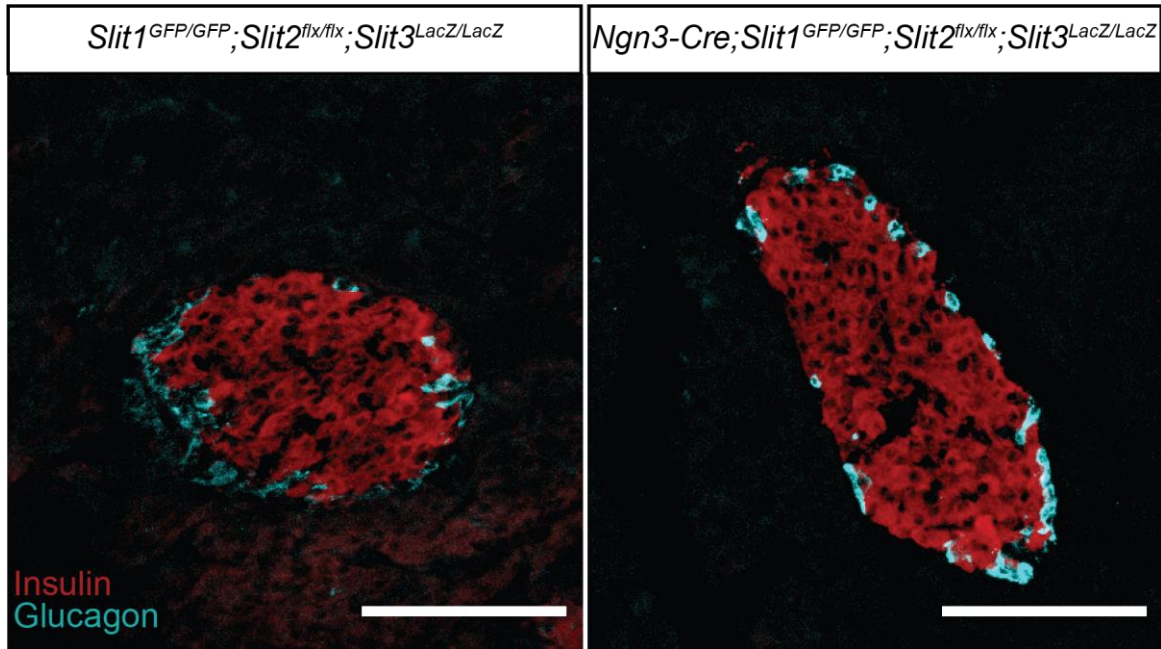

**Figure 6: Deletion of all three Slits in the endocrine compartment does not affect islet morphogenesis.** Immunofluorescence staining of  $\beta$ -cells (Insulin, red) and  $\alpha$ -cells (Glucagon, cyan) in adult (~8 week old) *Slit1<sup>GFP/GFP</sup>;Slit2<sup>flx/flx</sup>;Slit3<sup>LacZ/LacZ</sup>* mice with and without *Ngn3-Cre*. Scale bar = 100 microns.

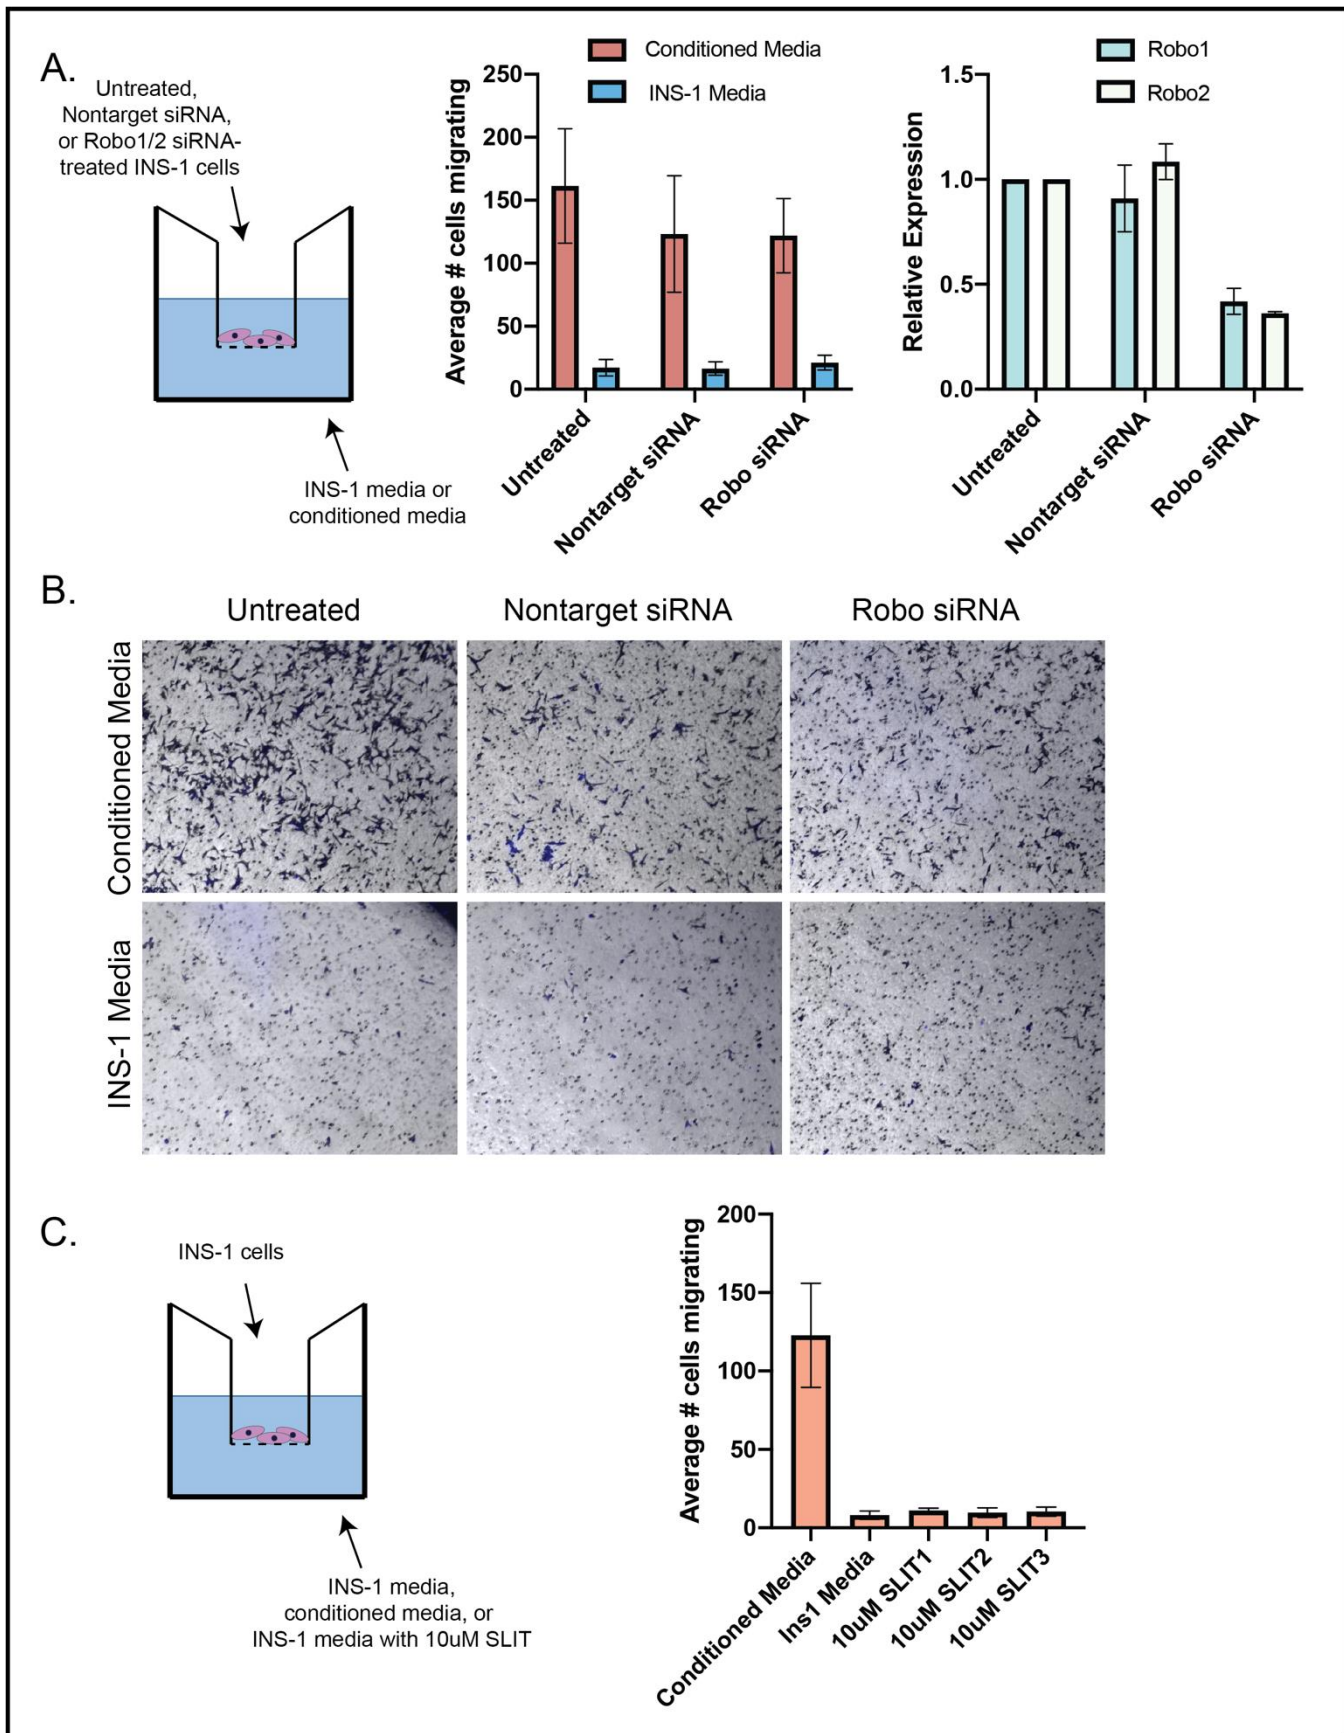

**Figure 7: Islet architecture changes are likely not due to changes in migratory ability.** (A) (Left) Transwell cell migration assay. INS-1 cells either untreated, treated with a nontarget siRNA, or treated with Robo1/2 siRNA were seeded in cell culture inserts over INS-1 conditioned media, or fresh INS-1 culture media. Data presented as mean  $\pm$ SEM. (Center) Results of cell migration assay. The average number of cells migrating per field of view (see B) is plotted. Data presented as mean  $\pm$ SEM (Right) qPCR validation of siRNA-mediated knockdown of Robo1 and Robo2. (B) Representative images of a single field of view of a cell migration insert used in the experiments shown in (A). (C) (Left) Transwell cell migration assay. INS-1 cells were seeded in cell culture inserts over INS-1 conditioned media, fresh INS-1 culture media, or fresh INS-1 culture media supplemented with 10 $\mu$ M recombinant SLIT. The average number of cells migrating per field of view is plotted. Data presented as mean  $\pm$ SEM.

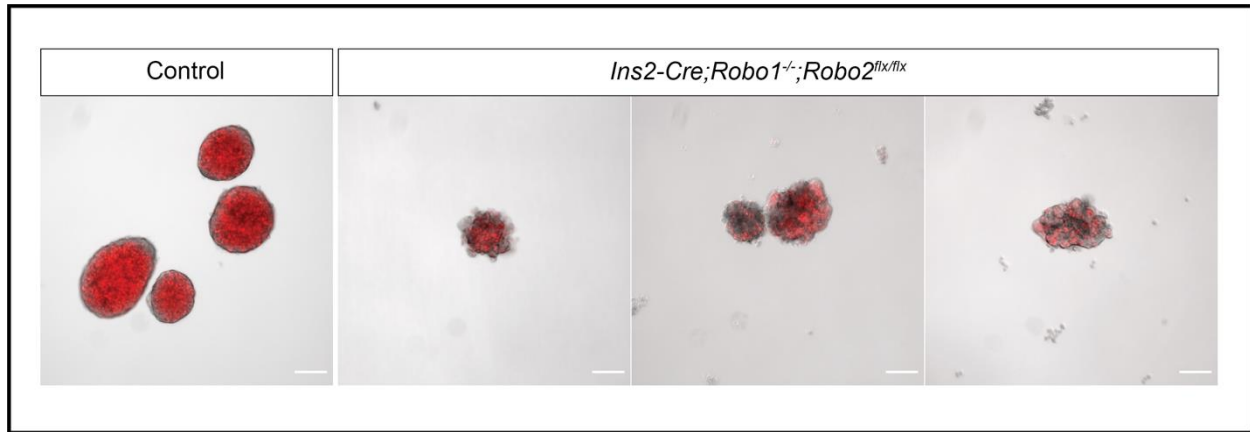

**Figure 8: *Robo*  $\beta$ KO islets have cell-cell adhesion defects.** Representative images of isolated islets from control (*Ins2-Cre;Robo1<sup>+/+</sup>;Robo2<sup>+/+</sup>*) or *Robo* $\beta$ KO (*Ins2-Cre;Robo1<sup>-/-</sup>;Robo2<sup>flx/flx</sup>*) animals containing an H2B-mCherry reporter after 24 hours in culture. mCherry marks Cre-mediated recombination in  $\beta$ -cell nuclei. *Robo*  $\beta$ KO islets look “fluffy” and fall apart after isolation.
